# Supplementary material
Source: MDPI journal article supplement (https://www.mdpi.com/2075-5309/12/3/311)
Supplement: s1 [file s1]

# The Environmental Profile of Clinker, Cement, and Concrete: A Life Cycle Perspective Study Based on Ecuadorian Data

Daniel M. Petroche and Angel D. Ramirez \*

Facultad de Ingeniería en Mecánica y Ciencias de la Producción, Escuela Superior Politécnica del Litoral, ESPOL, Campus Gustavo Galindo, Km. 30.5 Vía Perimetral, Guayaquil P.O. Box 09-01-5863, Ecuador; dpetroch@espol.edu.ec

\* Correspondence: aramire@espol.edu.ec; Tel.: +593-042-269-351; Fax: +593-042-852-804

**Citation:** Petroche, D.M.; Ramirez, A.D. The Environmental Profile of Clinker, Cement, and Concrete: A Life Cycle Perspective Study Based on Ecuadorian Data. *Buildings* **2022**, *12*, 311. <https://doi.org/10.3390/buildings12030311>

Academic Editors: João Gomes Ferreira and Ana Isabel Marques

Received: 28 January 2022

Accepted: 2 March 2022

Published: 6 March 2022

**Publisher's Note:** MDPI stays neutral with regard to jurisdictional claims in published maps and institutional affiliations.

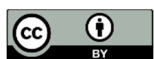

**Copyright:** © 2022 by the authors. Licensee MDPI, Basel, Switzerland. This article is an open access article distributed under the terms and conditions of the Creative Commons Attribution (CC BY) license (<http://creativecommons.org/licenses/by/4.0/>).

**Table S1.** Summary of processes taken from Ecoinvent database for LCIA Clinker in Ecuador

| Input/output inventory item                   | OpenLCA - Ecoinvent database                                                                                              |
|-----------------------------------------------|---------------------------------------------------------------------------------------------------------------------------|
| <b>Raw Materials</b>                          |                                                                                                                           |
| Clay                                          | clay pit operation   clay   APOS, U - RoW                                                                                 |
| Limestone                                     | limestone production, crushed, for mill   limestone, crushed, for mill   APOS, U - RoW                                    |
| Steel Slag                                    | electric arc furnace slag                                                                                                 |
| Copper Slag                                   | copper slag                                                                                                               |
| Fluorite                                      | fluorspar production, 97% purity   fluorspar, 97% purity   APOS, U - GLO                                                  |
| Iron ore                                      | iron ore mine operation, 46% Fe   iron ore, crude ore, 46% Fe   APOS, U - GLO                                             |
| Clay                                          | clay pit operation   clay   APOS, U - RoW                                                                                 |
| Limestone                                     | limestone production, crushed, for mill   limestone, crushed, for mill   APOS, U - RoW                                    |
| <b>Fuels and energy</b>                       |                                                                                                                           |
| Oil and lubricants                            | market for lubricating oil   lubricating oil   APOS, U - RoW                                                              |
| Diesel                                        | diesel production, low-sulfur, petroleum refinery operation   diesel, low-sulfur   APOS, U - CO                           |
| Petroleum Coke                                | petroleum coke production, petroleum refinery operation   petroleum coke   APOS, U - RoW                                  |
| Biomass                                       | biowaste                                                                                                                  |
| Used oils                                     | waste mineral oil                                                                                                         |
| Municipal solid waste                         | municipal solid waste                                                                                                     |
| <b>Other flows</b>                            |                                                                                                                           |
| Steel 18/8, hot rolled                        | market for steel, chromium steel 18/8, hot rolled   steel, chromium steel 18/8, hot rolled   APOS, U - GLO                |
| Tap water                                     | market for tap water   tap water   APOS, U - PE                                                                           |
| Cement Factory                                | market for cement factory   cement factory   APOS, U - GLO                                                                |
| Refractory brick, basic, packed               | market for refractory, basic, packed   refractory, basic, packed   APOS, U - GLO                                          |
| Refractory brick, fireclay, packed            | market for refractory, fireclay, packed   refractory, fireclay, packed   APOS, U - GLO                                    |
| Refractory brick, high aluminum oxide, packed | market for refractory, high aluminium oxide, packed   refractory, high aluminium oxide, packed   APOS, U - GLO            |
| Industrial machinery                          | market for industrial machine, heavy, unspecified   industrial machine, heavy, unspecified   APOS, U - RoW                |
| <b>Transport</b>                              |                                                                                                                           |
| Transport, Truck > 32 tonnes, EURO3           | transport, freight, lorry >32 metric ton, EURO3   transport, freight, lorry >32 metric ton, EURO3   APOS, U - RoW         |
| Transport, Maritime, in bulk for dry products | transport, freight, sea, bulk carrier for dry goods   transport, freight, sea, bulk carrier for dry goods   APOS, U - GLO |
| Transportation, bands                         | transport, freight, conveyor belt   transport, freight, conveyor belt without electricity   APOS, U - GLO                 |

**Table S2.** Summary of processes taken from Ecoinvent database for LCIA Cement in Ecuador

| Input/output inventory item                   | OpenLCA - Ecoinvent database                                                                                              |
|-----------------------------------------------|---------------------------------------------------------------------------------------------------------------------------|
| <b>Raw Materials</b>                          |                                                                                                                           |
| Limestone                                     | limestone production, crushed, for mill   limestone, crushed, for mill   APOS, U - RoW                                    |
| Gypsum                                        | gypsum quarry operation   gypsum, mineral   APOS, U - RoW                                                                 |
| Other flows                                   |                                                                                                                           |
| Cement Factory                                | market for cement factory   cement factory   APOS, U - GLO                                                                |
| Low alloy steel                               | market for steel, low-alloyed   steel, low-alloyed   APOS, U - GLO                                                        |
| <b>Transport</b>                              |                                                                                                                           |
| Transport, Truck > 32 tonnes, EURO3           | transport, freight, lorry >32 metric ton, EURO3   transport, freight, lorry >32 metric ton, EURO3   APOS, U - RoW         |
| Transport, Maritime, in bulk for dry products | transport, freight, sea, bulk carrier for dry goods   transport, freight, sea, bulk carrier for dry goods   APOS, U - GLO |
| Transportation, bands                         | transport, freight, conveyor belt   transport, freight, conveyor belt without electricity   APOS, U - GLO                 |

**Table S3.** Summary of processes taken from Ecoinvent database for LCIA Concrete in Ecuador

| Input/output inventory item         | OpenLCA - Ecoinvent database                                                                                                    |
|-------------------------------------|---------------------------------------------------------------------------------------------------------------------------------|
| <b>Raw Materials</b>                |                                                                                                                                 |
| Coarse Aggregate                    | gravel production, crushed   gravel, crushed   APOS, U - RoW                                                                    |
| Natural sand                        | sand quarry operation, extraction from river bed   sand   APOS, U - RoW                                                         |
| Crushed Sand                        | gravel and sand quarry operation   sand   APOS, U - RoW                                                                         |
| Tap water                           | market for tap water   tap water   APOS, U - PE                                                                                 |
| Concrete admixtures                 | chemical production, organic   chemical, organic   APOS, U - GLO                                                                |
| <b>Fuels and energy</b>             |                                                                                                                                 |
| Diesel (Building machine)           | diesel, burned in building machine   diesel, burned in building machine   APOS, U - GLO                                         |
| Diesel (Electric Generator)         | diesel, burned in diesel-electric generating set, 10MW   diesel, burned in diesel-electric generating set, 10MW   APOS, U - GLO |
| <b>Other flows</b>                  |                                                                                                                                 |
| Oil and lubricants                  | lubricating oil production   lubricating oil   APOS, U - RoW                                                                    |
| Synthetic rubber                    | market for synthetic rubber   synthetic rubber   APOS, U - GLO                                                                  |
| Concrete mixing factory             | market for concrete mixing factory   concrete mixing factory   APOS, U - GLO                                                    |
| Low alloy steel                     | market for steel, low-alloyed, hot rolled   steel, low-alloyed, hot rolled   APOS, U - GLO                                      |
| <b>Transport</b>                    |                                                                                                                                 |
| Transport, Truck > 32 tonnes, EURO3 | transport, freight, lorry >32 metric ton, EURO3   transport, freight, lorry >32 metric ton, EURO3   APOS, U - RoW               |

**Table S4.** Life cycle inventories of clinker production in Ecuador (per ton of clinker)

| Flow inventory item                                 | Amount                  | Unit    |
|-----------------------------------------------------|-------------------------|---------|
| <b>Input</b>                                        |                         |         |
| <b>Raw Materials</b>                                |                         |         |
| Limestone, crushed, for mill                        | 1432.63                 | kg      |
| Clay 1                                              | 175.44                  | kg      |
| Clay 2                                              | 26.56                   | kg      |
| Clay 3                                              | 6.36                    | kg      |
| Clay 4                                              | 0.12                    | kg      |
| Iron ore, crude ore, 46% Fe                         | 0.41                    | kg      |
| Fluorspar, 97% purity                               | 0.18                    | kg      |
| Copper slag                                         | 14.37                   | kg      |
| Slag, unalloyed electric arc furnace steel          | 0.146                   | kg      |
| <b>Fuels and energy</b>                             |                         |         |
| Petroleum coke                                      | 88.91                   | kg      |
| Diesel, low-sulfur                                  | 0.32                    | kg      |
| Electricity, medium voltage                         | 71.24                   | kWh     |
| <b>Alternative fuels</b>                            |                         |         |
| Biowaste                                            | 18.99                   | kg      |
| Municipal solid waste                               | 3.24                    | kg      |
| Waste mineral oil                                   | 0.47                    | kg      |
| <b>Other flows</b>                                  |                         |         |
| Refractory, basic, packed                           | 0.190                   | kg      |
| Refractory, high aluminium oxide, packed            | 0.137                   | kg      |
| Refractory, fireclay, packed                        | 0.082                   | kg      |
| Steel, chromium steel 18/8, hot rolled              | 0.059                   | kg      |
| Lubricating oil                                     | 0.047                   | kg      |
| Tap water                                           | 2.76                    | kg      |
| Industrial machine, heavy, unspecified              | 0.038                   | kg      |
| Cement factory                                      | 9.45 x10 <sup>-09</sup> | Item(s) |
| <b>Transport</b>                                    |                         |         |
| transport, freight, conveyor belt                   | 2.11                    | t*km    |
| transport, freight, lorry >32 metric ton, EURO3     | 38.36                   | t*km    |
| transport, freight, sea, bulk carrier for dry goods | 449.45                  | t*km    |
| <b>Output</b>                                       |                         |         |
| <b>Emissions to air</b>                             |                         |         |
| Carbon dioxide, fossil                              | 842.69                  | kg      |
| Nitrogen oxides                                     | 1.61                    | kg      |
| Sulfur dioxide                                      | 0.058                   | kg      |
| Particulates, < 2.5 um                              | 0.0046                  | kg      |

Table S4. Cont.

| Flow inventory item                                      | Amount | Unit |
|----------------------------------------------------------|--------|------|
| Particulates, > 10 um                                    | 0.0033 | kg   |
| Particulates, > 2.5 um, and < 10um                       | 0.0017 | kg   |
| VOC, volatile organic compounds, unspecified origin      | 0.077  | kg   |
| Ammonia                                                  | 25.00  | mg   |
| Antimony                                                 | 2.00   | mg   |
| Arsenic                                                  | 5.90   | mg   |
| Benzene                                                  | 88.00  | mg   |
| Cadmium                                                  | 6.00   | mg   |
| Carbon monoxide, fossil                                  | 0.875  | kg   |
| Chromium                                                 | 8.80   | mg   |
| Cobalt                                                   | 11.80  | mg   |
| Copper                                                   | 14.70  | mg   |
| Hydrogen chloride                                        | 13.50  | mg   |
| Lead                                                     | 17.60  | mg   |
| Mercury                                                  | 2.80   | mg   |
| Nickel                                                   | 11.80  | mg   |
| Thallium                                                 | 6.00   | mg   |
| Vanadium                                                 | 17.60  | mg   |
| Dioxins, measured as 2,3,7,8-tetrachlorodibenzo-p-dioxin | 0.097  | µg   |
| <b>Solid waste</b>                                       |        |      |
| Inert waste, for final disposal                          | 0.179  | kg   |
| Municipal solid waste                                    | 0.044  | kg   |

Table S5. Life cycle inventories of concrete production in Ecuador (per m3 of ready-mixed concrete)

| Flow inventory item                                    | Unit | 2.5                   | 15                    | 18                    | 21                    | 24                    | 28                    | 30                    | 35                    | 40                    | 45                    | 50                    | 60                    | 80                    |
|--------------------------------------------------------|------|-----------------------|-----------------------|-----------------------|-----------------------|-----------------------|-----------------------|-----------------------|-----------------------|-----------------------|-----------------------|-----------------------|-----------------------|-----------------------|
| Raw Materials                                          |      |                       |                       |                       |                       |                       |                       |                       |                       |                       |                       |                       |                       |                       |
| Cement, HE Type                                        | kg   | 137.69                | 251.71                | 275.16                | 291.09                | 313.4                 | 331.85                | 356.81                | 387.99                | 455.18                | 485.8                 | 492.52                | 544.11                | 583.53                |
| Gravel, crushed                                        | kg   | 280.49                | 725.06                | 835.11                | 857                   | 883.19                | 892.29                | 935.47                | 951.68                | 912.42                | 848.52                | 941.76                | 983.01                | 886.57                |
| Sand, crushed                                          | kg   | 228.28                | 150.55                | 186.91                | 265.49                | 149.32                | 207.37                | 363.05                | 154.04                | 230.99                | 122.64                | 163.01                | 194.25                | 295.96                |
| Sand, from river bed                                   | kg   | 1449.8                | 954.34                | 826.94                | 732.01                | 768.43                | 730.49                | 471.25                | 670.3                 | 554.11                | 668.01                | 553.42                | 457.33                | 375.17                |
| Tap water                                              | kg   | 195.73                | 190.49                | 179.16                | 179.15                | 184.86                | 178.71                | 189.36                | 162.13                | 171.25                | 193.12                | 173.25                | 176.94                | 179.02                |
| Chemical, organic 1                                    | kg   | 2.92                  | 1.05                  | 1.56                  | 1.49                  | 2.4                   | 2.29                  | 3.15                  | 4.3                   | 6.51                  | 4.5                   | 5.84                  | 8.92                  | 9.14                  |
| Chemical, organic 2                                    | kg   | 0.01                  | 1                     | 1.42                  | 1.83                  | 1.21                  | 1.69                  | 1.15                  | 1.12                  | 0.87                  | 0.56                  | 1.09                  | 0.15                  | 0                     |
| Other flows                                            |      |                       |                       |                       |                       |                       |                       |                       |                       |                       |                       |                       |                       |                       |
| Concrete mixing factory                                | Item | 2.58x10 <sup>-7</sup> | 2.52x10 <sup>-7</sup> | 3.34x10 <sup>-7</sup> | 3.23x10 <sup>-7</sup> | 3.30x10 <sup>-7</sup> | 3.28x10 <sup>-7</sup> | 3.16x10 <sup>-7</sup> | 2.94x10 <sup>-7</sup> | 2.40x10 <sup>-7</sup> | 2.78x10 <sup>-7</sup> | 2.71x10 <sup>-7</sup> | 2.90x10 <sup>-7</sup> | 1.47x10 <sup>-7</sup> |
| Diesel, burned in diesel-electric generating set, 10MW | MJ   | 9.59                  | 2.02                  | 5.49                  | 3.31                  | 5.23                  | 9.96                  | 1.11                  | 6.32                  | 2.47                  | 5.58                  | 8.97                  | 5.2                   | 0.04                  |
| Lubricating oil                                        | kg   | 0.0499                | 0.0499                | 0.0499                | 0.0499                | 0.0499                | 0.0499                | 0.0499                | 0.0499                | 0.0499                | 0.0499                | 0.0499                | 0.0499                | 0.0499                |
| Steel, low-alloyed, hot rolled                         | kg   | 0.0238                | 0.0238                | 0.0238                | 0.0238                | 0.0238                | 0.0238                | 0.0238                | 0.0238                | 0.0238                | 0.0238                | 0.0238                | 0.0238                | 0.0238                |
| Synthetic rubber                                       | kg   | 0.0636                | 0.0636                | 0.0636                | 0.0636                | 0.0636                | 0.0636                | 0.0636                | 0.0636                | 0.0636                | 0.0636                | 0.0636                | 0.0636                | 0.0636                |
| Fuels and energy                                       |      |                       |                       |                       |                       |                       |                       |                       |                       |                       |                       |                       |                       |                       |
| Electricity                                            | kWh  | 4.67                  | 4.43                  | 3.99                  | 4.35                  | 3.77                  | 4.17                  | 3.41                  | 4.89                  | 6.51                  | 4.86                  | 5.17                  | 5.74                  | 7.73                  |
| Diesel, burned in building machine                     | MJ   | 10.78                 | 6.94                  | 9.69                  | 9.09                  | 10                    | 10.06                 | 8.15                  | 8.85                  | 7.64                  | 11.03                 | 7.26                  | 7.38                  | 5.52                  |
| Transport                                              |      |                       |                       |                       |                       |                       |                       |                       |                       |                       |                       |                       |                       |                       |
| Transport, freight, lorry >32 metric ton, EURO3        | t*km | 112.35                | 145.6                 | 141.8                 | 137.97                | 166.36                | 138.07                | 210.1                 | 134.99                | 102.33                | 180.38                | 116.16                | 90.21                 | 53.81                 |
